# Supplementary material for: Targeting IKKβ Activity to Limit Sterile Inflammation in Acetaminophen-Induced Hepatotoxicity in Mice
Source: MDPI journal article supplement (doi:10.3390/pharmaceutics15020710), 2023-02-20
Supplement: s1 [file s1]

## Supplementary materials

Targeting IKK $\beta$  Activity to Limit Sterile Inflammation in Acetaminophen-Induced Hepatotoxicity in Mouse.

Song-Hee Kim <sup>1,†</sup>, Da-Eun Jung <sup>1,†</sup>, Jin Yong Song <sup>1</sup>, Jihye Jung <sup>1</sup>, Jae-Kyung Jung <sup>1</sup>, Heesoon Lee <sup>1</sup>, Eunmiri Roh <sup>2</sup>, Jin Tae Hong <sup>1</sup>, Sang-Bae Han <sup>1</sup> and Youngsoo Kim <sup>1,\*</sup>

<sup>1</sup>College of Pharmacy, Chungbuk National University, Cheongju 28160, Republic of Korea

<sup>2</sup>Department of Cosmetic Science, Kwangju Women's University, Gwangju 62396, Republic of Korea

\*Correspondence: [youngsoo@chungbuk.ac.kr](mailto:youngsoo@chungbuk.ac.kr)

<sup>†</sup>These authors contributed equally to this work.

---

## Contents

Table S1

Figures S1 to S5

**Table S1.** Nucleotide sequence of RT-PCR primer.

| Target         | Nucleotide sequence |                                 | Amplicon |
|----------------|---------------------|---------------------------------|----------|
| CCL2           | Forward             | 5'-CCAGCTCTCTCTTCCTCCAC-3'      | 494 bp   |
|                | Reverse             | 5'-AAGGCATCACAGTCCGAGTC-3'      |          |
| CXCL1          | Forward             | 5'-GCTGGGATTACCTCAAGAA-3'       | 469 bp   |
|                | Reverse             | 5'-TGATGGGCAGCAGGTCTCAT-3'      |          |
| CXCL2          | Forward             | 5'-AAAGTTTGCCTTGACCCTGA-3'      | 498 bp   |
|                | Reverse             | 5'-CACCCCTTATCCCCAGTCTC-3'      |          |
| CYP1A2         | Forward             | 5'-AGAGCGGTTTCTTACCAATA-3'      | 526 bp   |
|                | Reverse             | 5'-GCCAGAGTAGGCAAATCT-3'        |          |
| CYP2E1         | Forward             | 5'-GATGAATATGCCCTACATG-3'       | 468 bp   |
|                | Reverse             | 5'-TGATGGGCAGCAGGTCTCAT-3'      |          |
| GSTP1          | Forward             | 5'-ATGCCACCATACACCATGTC-3'      | 161 bp   |
|                | Reverse             | 5'-GGGAGCTGCCCATACAGAC-3'       |          |
| GSTT1          | Forward             | 5'-AGGCTCGTGCTCGTGTAGA-3'       | 96 bp    |
|                | Reverse             | 5'-CAGGGAACATCACCTTATGCC-3'     |          |
| IL-1 $\beta$   | Forward             | 5'-CCTGTCCTGTGTAATGAAAGACGGC-3' | 526 bp   |
|                | Reverse             | 5'-GTGCTGCCTAATGTCCCCTTGAATC-3' |          |
| IL-6           | Forward             | 5'-CCGGAGAGGAGACTTCACAG-3'      | 134 bp   |
|                | Reverse             | 5'-CAGAATTGCCATTGCACAAC-3'      |          |
| TNF- $\alpha$  | Forward             | 5'-ATGAGCACAGAAAGCATGATCCGC-3'  | 644 bp   |
|                | Reverse             | 5'-CCAAAGTAGACCTGCCCGGACTC-3'   |          |
| $\beta$ -Actin | Forward             | 5'-CACCACACCTTCTACAATGAGCTGC-3' | 745 bp   |
|                | Reverse             | 5'-GCTCAGGAGGAGCAATGATCTTGAT-3' |          |

Abbreviation: bp, base pairs.

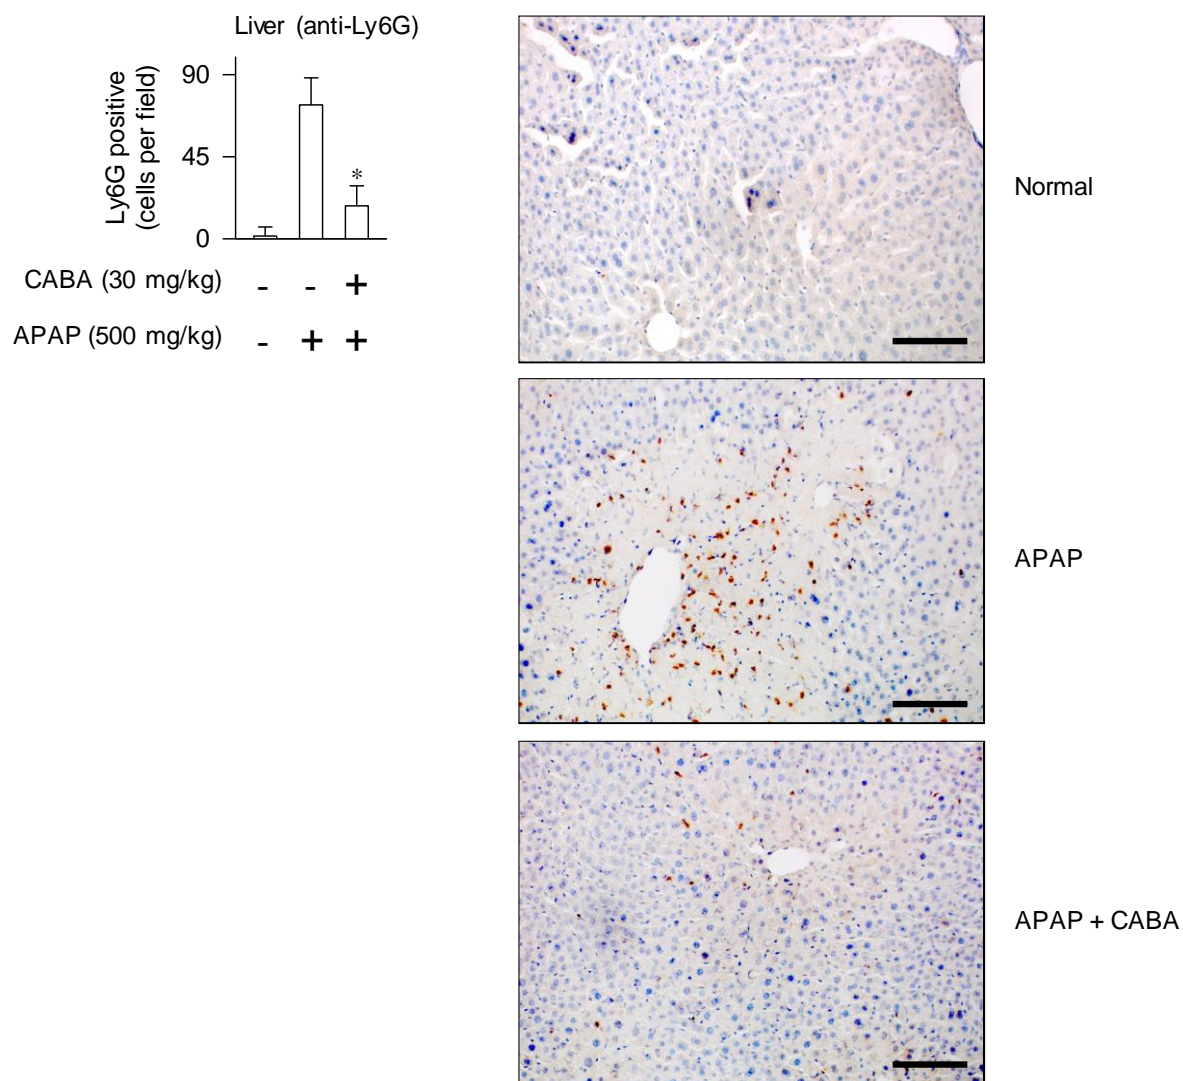

**Figure S1.** C57BL/6 mice were treated with CABA at 1 h after APAP overdose. Liver lobules were biopsied at the time lapse of 15 h. Liver tissues were sectioned in a thickness of 5  $\mu\text{m}$ , reacted with anti-Ly6G antibody, and examined under microscope. Black scale bars are 100  $\mu\text{m}$ .  $*P < 0.05$  vs. APAP alone.

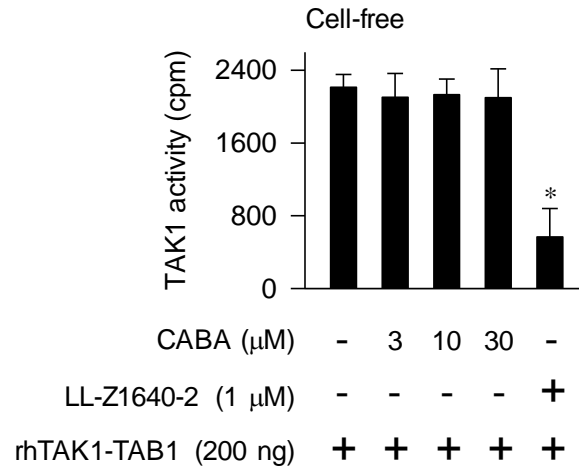

**Figure S2.** Catalytically active rhTAK1-TAB1 was treated with CABA or LL-Z1640-2 for 10 min in cell-free reactions. *In vitro* kinase activity was determined by the incorporation of [ $^{32}\text{P}$ ] onto MBP as exogenous substrate from [ $\gamma\text{-}^{32}\text{P}$ ]-labeled ATP, and represented as count per min (cpm). LL-Z1640-2 was employed as positive control agent inhibiting TAK1 activity. \* $P < 0.05$  vs. rhTAK1-TAB1 alone.

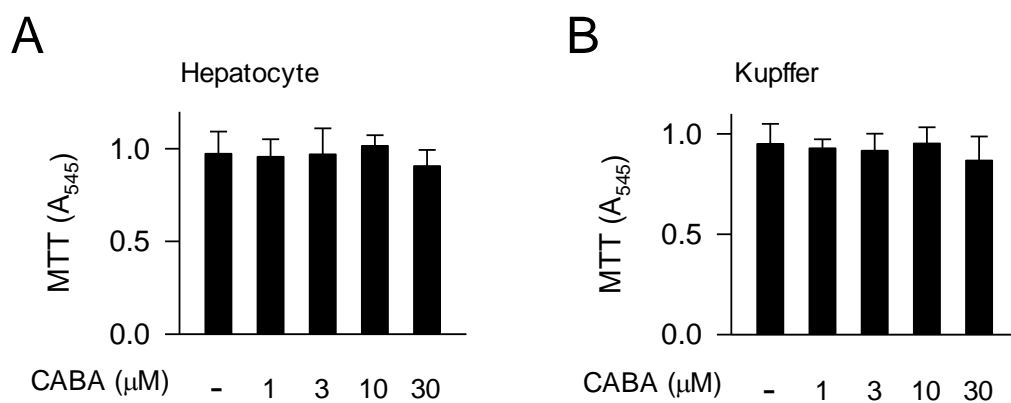

**Figure S3.** Primary hepatocytes (A) or Kupffer cells (B) were incubated with CABA for 24 h, and reacted with MTT for another 1 h. Formazan crystals were dissolved in 50% dimethyl sulfoxide and measured the absorbance values at wavelength 545 nm ( $A_{545}$ ).

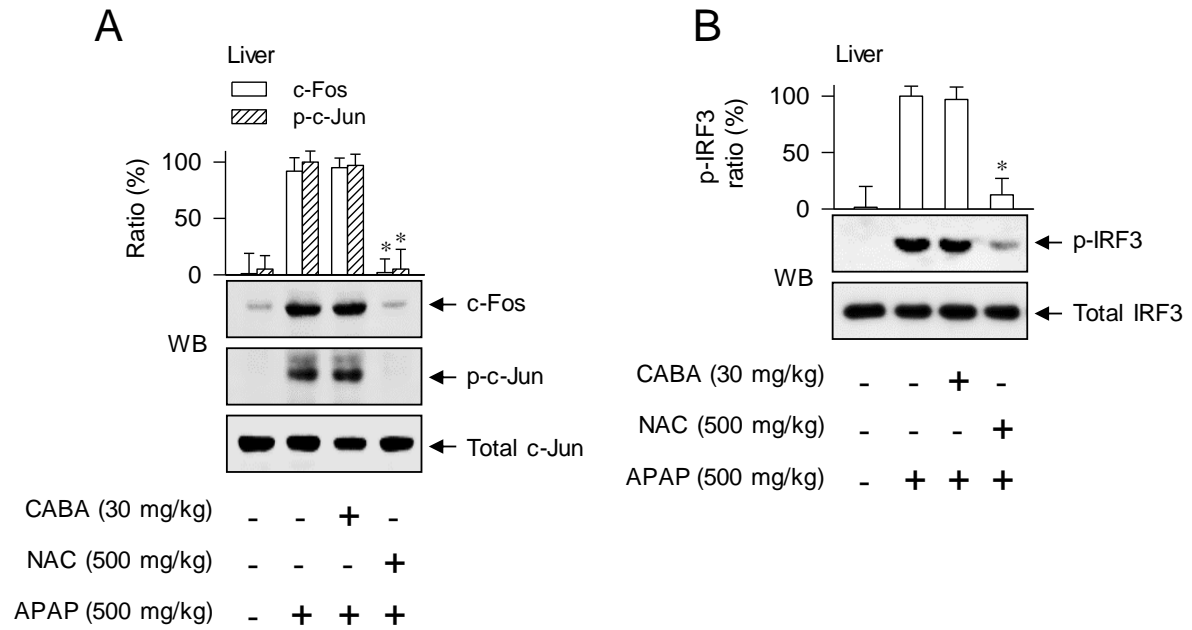

**Figure S4.** C57BL6 mice were treated with CABA at 1 h after APAP overdose. Liver lobules were biopsied at the time lapse of 15 h. Protein extracts were subjected to Western blot (WB) analysis with anti-Fos, anti-p-c-Jun or anti-c-Jun antibody (**A**) and anti-p-IRF3 or anti-IRF3 (**B**). \* $P < 0.05$  vs. APAP alone.

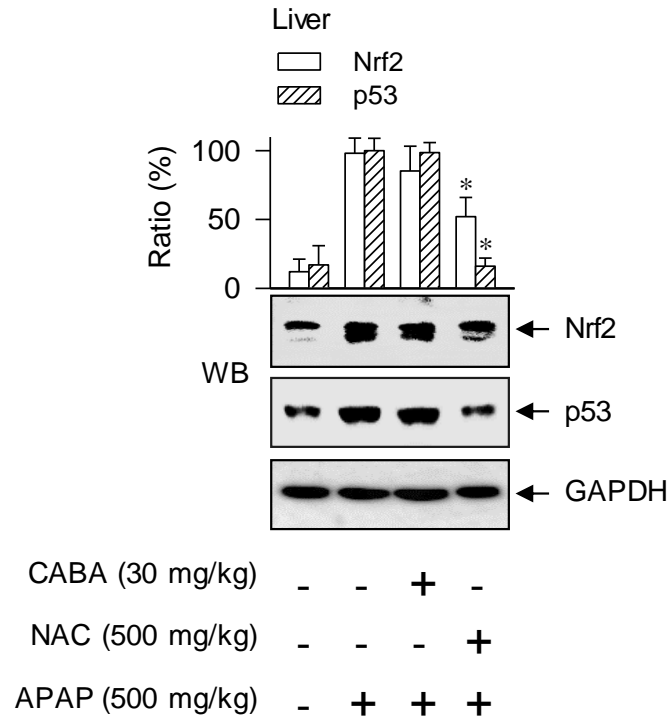

**Figure S5.** C57BL6 mice were treated with CABA at 1 h after APAP overdose. Liver lobules were biopsied at the time lapse of 15 h. Protein extracts were subjected to Western blot (WB) analysis with anti-Nrf2, anti-p53 or anti-GAPDH antibody. \* $P < 0.05$  vs. APAP alone.
